# Supplementary material for: Targeting excessive skin cholesterol deposition driven by lymphatic insufficiency alleviates secondary lymphedema
Source: Research Square preprint supplement (doi:10.21203/rs.3.rs-3884998/v1), 2024-02-07
Supplement: Supplementary file 1 [file 43ebed6fe82e222cfa7a8d19.xlsx]

## Sheet: Index
ID	Description
Extended data Table S1	Patient characteristics
Extended data Table S2	Plasma adipokines compared between healthy and stage 2 lymphedema patients
Extended data Table S3	Plasma cytokines compared between healthy and stage 2 lymphedema patients
Extended data Table S4	List of triglycerides in skin of WT and Apoe-/- mice across age
Extended data Table S5	List of free fatty acids in skin of WT and Apoe-/- mice across age
Extended data Table S6	List of triglycerides in plasma of WT and Apoe-/- mice across age
Extended data Table S7	List of free fatty acids in plasma of WT and Apoe-/- mice across age

## Sheet: STable 1
Extended data Table S1: Patient demographics
		Healthy control	ISL Stage 2	ISL Stage 2b &3
	Samples	12	25	5
	Age	53±13 (50-65)	61.2±2.5 (28-78)	74±1 (>70)
	Gender	Female	Female	Female
	Body Mass Index (BMI)	28.6±3.7 (24.9 - 32.3)	26.2±0.88 (18.2 - 41.3)	25.2±1.05(24.1 – 26.2)
	Medical History	Normal	Breast or cervical cancer	Breast or cervical cancer
	Total Plasma cholesterol (mg/dl)	122±6.53	157.4±8.12*	164.6±23.39
Data expressed as mean±SEM; *p<0.05

## Sheet: STable 2
Extended data Table S2: Plasma adipokines compared between healthy and stage 2 lymphedema patients
Adipokines	Healthy			Stage 2 patients			p-value
	MEAN	SEM	samples	MEAN	SEM	samples
Adiponectin	34985857	9359242	15	22309905	3075412	17	0.6548
Lipocalin	55520	6149	15	119391	12497	19	<0.0001
Resistin	15572.5	1962.75	15	32877	5660.91	19	0.0003
Adipsin	2256349	177297	15	4017953	546951	19	<0.0001
PAI	13570	2305	15	31360	3581	19	0.0003
units are expressed as pg/ml

## Sheet: STable 3
Extended data Table S3: Plasma adipokines compared between healthy and stage 2 lymphedema patients
	Cytokines	Healthy			Stage 2 patients			p-value
S/No.		MEAN	SEM	samples	MEAN	SEM	samples
1	s+B5:G20CD40L	518.4	208	15	1066	453.5	20	0.268
2	EGF	52.11	12.57	9	62.21	24.86	11	0.5516
3	Eotaxin	167.7	14.43	15	58.51	4.124	20	<0.0001
4	fgf-2	215.2	25.47	15	186.5	14	20	0.5151
5	FLT-3L	19.08	5.103	15	13.77	1.654	20	0.8823
6	Fractalkine	230.2	25.29	15	211.1	12.6	20	0.7987
7	G-CSF	39.76	5.586	10	33.36	9.57	2	0.4848
8	GM CSF	not detectable			not detectable
9	GROa	21.79	4.429	14	9.057	2.458	16	0.0104
10	IFNa2	44.93	7.159	15	40.19	3.786	20	0.8629
11	IFNy	4.639	0.9325	15	4.468	1.023	19	0.7064
12	IL-1a	8.422	1.957	15	5.703	0.8638	20	0.3771
13	IL-1b	19.33	3.679	15	16.47	3.281	20	0.5924
14	IL-1RA	10.94	1.98	15	10.14	0.9549	20	0.4937
15	IL-2	1.614	0.5386	9	1.21	0.3296	6	0.8877
16	IL-3	0.4667	0.304	3	1.14	0.4138	7	0.1917
17	IL-4	2.685	0.4822	6	2.112	0.3836	16	0.407
18	IL-5	7.519	1.796	15	4.775	0.4264	19	0.566
19	IL-6	1.707	0.2627	15	3.063	0.4397	20	0.0063
20	IL-7	5.714	1.586	7	5.985	3.244	13	0.0811
21	IL-8	5.911	0.6518	15	3.595	0.803	20	0.0004
22	IL-9	46.59	7.597	8	19.51	3.467	9	0.0114
23	IL-10	9.37	6.736	3	3.934	1.445	5	0.5714
24	IL-12 (p40)	65.93	6.526	15	72.83	7.476	20	0.7734
25	IL-12 (p70)	6.184	1.311	15	14.35	2.158	20	0.0026
26	IL-13	43.42	13.39	14	25.19	3.877	18	0.3927
27	IL-15	16.75	5.236	15	8.043	0.785	20	0.1082
28	IL-17A	13.57	3.16	15	11	1.048	20	0.6988
29	IL-17E/IL-25	209.6	36.35	7	94.99	15.22	6	0.0198
30	IL-17F	44.04	15.92	12	8.998	2.191	17	0.0176
31	IL-18	26.14	4.119	15	37.19	6.016	19	0.3908
32	IL-22	48.9	17.71	15	22.9	2.709	21	0.0228
33	IL-27	1797	191.8	15	1604	169.9	20	0.3136
34	IP-10	115	10.08	15	238.2	21.23	19	<0.0001
35	MCP-1	453	54.74	15	323.8	25.42	20	0.0277
36	MCP-3	27.08	4.692	13	21.07	2.156	20	0.4177
37	M-CSF	73.62	22.13	4	50.6	12.88	5	0.9048
38	MDC	500.3	35.66	15	761.5	90.03	20	0.0044
39	MIG	909.3	137.6	15	1269	169.2	19	0.0396
40	MIP-1a	43.8	7.772	13	26.68	3.103	18	0.1032
41	MIP-1b	32.56	3.472	15	37.99	2.929	20	0.2051
42	PDGF-AA	695.4	186.9	15	2258	341.2	20	0.0002
43	PDGF-AB/BB	11353	2969	12	19075	1925	20	0.0292
44	RANTES	5312	936.9	15	4931	359.8	20	0.9345
45	TGFa	13.43	5.063	12	4.709	0.7987	18	0.1104
46	TNFa	33.31	5.108	15	29.87	2.847	20	0.7358
47	TNFb	28.08	16.21	10	7.894	1.276	17	0.1997
48	VEGF-A	64.32	20.62	10	148.1	24.97	20	0.0216
	units are expressed as pg/ml

## Sheet: STable 4
Extended data Table S4: List of triglycerides in skin of WT and Apoe-/- mice across age
TG in skin (pmol/mg)	10weeks					17weeks					>30weeks
	WT		Apoe-/-		p-value	WT		Apoe-/-		p-value	WT		Apoe-/-		p-value
	mean	sem	mean	sem		mean	sem	mean	sem		mean	sem	mean	sem
TG 52:5 [-18:2]	134.5	63.8	53.59	8.87	0.5237	58.76	11.85	105.8	28.65	0.3562	54.94	10.37	41.3	6.78	0.4634
TG 52:5	232.6	81.4	130	14.61	0.4351	139	20.32	203.4	38.83	0.3154	132.1	16.26	113.5	12.7	0.5358
TG 52:5 [-16:1]	86.94	39.43	35.01	6.265	0.3543	41.04	9.476	73.98	20.01	0.3562	37.62	6.86	29.46	5.507	0.5358
TG 52:5 [-18:3]	38.44	14.33	18.7	2.591	0.3543	20.59	4.023	37.36	9.134	0.211	20.68	2.95	16.65	2.996	0.281
TG 48:2 [-14:0]	697	242.3	382.4	99.43	0.3543	452.3	105.8	686.4	121.8	0.2428	452	105	390.5	123	0.7789
TG 48:2 [-16:1]	1295	449.7	702.3	168.2	0.3543	868.3	196.2	1191	164.3	0.2775	867.2	214.7	780.2	276	0.5358
TG 48:2 [-18:1]	907.5	263.7	569.8	172.5	0.3543	614.2	137.4	920	143.6	0.2775	644	155.4	594.7	185.1	0.7789
TG 48:2	2241	737.5	1275	323.2	0.2844	1445	321.8	1964	269.7	0.2775	1456	329	1307	425	0.7789
TG 48:2 [-16:0]	806.7	304.9	385.5	93.38	0.2844	478.3	113.7	754.3	135.4	0.1564	481.8	113.8	416.4	148.1	0.7789
TG 48:2 [-18:2]	169.5	79.05	71.18	18.14	0.6216	83.17	22.43	149.7	34.18	0.1564	78.75	19.81	60.99	19.4	0.5358
TG 54:6 [-20:4]	18.14	5.115	12.1	3.497	0.2844	1.46	2.12	7.498	4.1	0.2775	11.11	2.116	8.748	1.997	0.4634
TG 50:3 [-16:1]	1993	632	1134	288	0.3543	1356	312.9	1741	224.4	0.549	1353	339.9	1185	380.1	0.5358
TG 50:3 [-18:1]	1234	372.1	753.1	205.6	0.4351	853.9	192.8	1158	171	0.6038	870.5	219.2	753.4	228.1	0.5358
TG 50:3	2453	784.3	1382	348.2	0.3543	1585	358.6	2072	277.6	0.4967	1570	359.2	1354	399.2	0.5358
TG 50:3 [-18:2]	609.7	247.4	285.7	67.76	0.4351	337.6	82.89	558.6	118	0.2775	307.2	63.37	253.4	69.15	0.7789
TG 50:3 [-16:0]	508.9	223.6	218	48.35	0.5237	263.5	65.9	461.2	103.1	0.211	245.2	51.34	202.6	60.27	0.7789
TG 56:7 [-20:4]	5.384	1.874	3.503	0.7709	0.4351	3.035	0.5189	5.702	1.61	0.4002	3.11	0.5246	2.229	0.4068	0.281
TG 52:4 [-16:1]	628.8	218.2	339	81.94	0.2222	387.2	88.59	587.9	117.1	0.4967	361.2	73.63	308.2	84.32	0.6126
TG 52:4	1464	490.3	764.6	152.2	0.2222	820.9	164.8	1199	205	0.3562	806.7	142.4	670.5	151.6	0.6943
TG 52:4 [-18:2]	1010	369.1	515.8	85.14	0.4351	546.7	104.9	867.5	173.3	0.3562	539.4	90.14	442.9	92.51	0.3969
TG 52:4 [-18:1]	727.7	246.8	392.9	92.14	0.1709	436.8	98.74	667.9	133	0.4967	413.1	84.04	354.9	92.18	0.6943
TG 52:4 [-16:0]	303	126.5	145.5	20.44	0.5237	139.7	19.63	257.8	66.13	0.1333	155	30.96	118.7	14.33	0.3969
TG 54:5 [-18:3]	50.27	12.44	32.21	4.93	0.2222	31.16	4.939	50.17	9.385	0.2428	31.82	3.839	30.2	4.605	0.6943
TG 54:5 [-18:1]	435.3	155.3	241.6	25.57	0.2844	233.6	31.32	370.5	78.84	0.3154	246.1	39.66	198	19.83	0.281
TG 48:1	2644	906.6	1445	416	0.3543	1542	352.6	2287	378.3	0.1823	1659	376	1563	560.8	0.6943
TG 48:1 [-14:0]	1085	358.6	621.4	199.2	0.2844	660.9	152.8	1042	166.3	0.1333	692.4	158.7	670.7	237.1	0.7789
TG 48:1 [-16:1]	565.9	213	284.1	71.12	0.3543	315.9	71.71	498.7	80.61	0.0789	345.3	83.63	315.8	135.2	0.5358
TG 48:1 [-16:0]	2396	842.2	1278	371.1	0.3543	1389	325.3	2130	334.5	0.1333	1491	341	1393	519	0.6943
TG 48:1 [-18:1]	925.3	302.4	541.4	173.2	0.2844	566.2	129.9	910.4	142.8	0.1333	595.6	133.4	569.4	199.5	0.8665
TG 50:2	6042	1814	3607	1138	0.2222	3577	777.1	4918	815.1	0.4967	3939	852.4	3560	1192	0.6943
TG 50:2 [-16:1]	2701	816.5	1635	524.9	0.2222	1665	371.1	2303	332	0.4967	1834	427.5	1693	609	0.5358
TG 50:2 [-16:0]	4179	1445	2224	657	0.1709	2303	514	3306	502.8	0.3154	2480	532.4	2296	828.6	0.6126
TG 50:2 [-18:1]	4428	1266	2812	947.8	0.3543	2769	607.1	3759	608.3	0.549	3053	695.6	2844	946.5	0.6943
TG 52:3	5843	1540	3667	1076	0.2222	3488	734.6	4568	785.1	0.7197	3828	831.1	3562	1075	0.7789
TG 52:3 [-16:0]	1604	583.9	847.9	195.7	0.2222	842.5	165.1	1336	231.2	0.1823	875.6	158.4	733.9	174.6	0.4634
TG 52:3 [-18:2]	1510	549.3	799.6	185.3	0.2222	788.8	155.9	1252	210.1	0.1564	832.8	146.9	710	166.7	0.5358
TG 54:4	1779	468.8	1106	269.4	0.1709	1056	184.3	1456	208.4	0.4002	1104	171.6	989.3	209	0.6943
TG 54:4 [-18:2]	1205	329.7	757.9	174.8	0.1709	708.7	119.3	1048	153.6	0.3154	748.1	122.3	688.8	142.3	0.7789
TG 54:4 [-18:1]	2450	689	1546	392.2	0.1709	1440	269	2050	309.9	0.4002	1516	269.3	1380	308.8	0.6943
TG 50:1 [-18:1]	2126	667.8	1264	448.2	0.1709	1162	249.3	1906	292.7	0.0947	1347	286	1307	490.3	0.7789
TG 52:1 [-18:1]	273.8	65.89	209.8	55.52	0.1709	184.1	27.15	330.9	66.76	0.0789	206.4	33.22	202.5	48.72	0.6943
TG 52:1 [-18:0]	365.7	88.21	270.1	72.01	0.1709	249.2	36.69	444.9	86.8	0.1333	275.6	44.28	275.1	64.54	0.7789
TG 54:2	450.1	71.81	356	92.88	0.3543	306.7	41.83	520.6	94.16	0.1128	358.9	56.24	334.3	61.53	0.9551
TG 54:2 [-18:1]	671.8	115.8	555.2	150.1	0.2222	458.6	67.09	799.5	151.1	0.0947	536.2	83.9	539.8	107.3	>0.9999
TG 54:2 [-18:0]	390.8	65.14	313.3	83.75	0.2222	259.8	32.79	468.5	100.2	0.0535	305.5	43.41	290.4	57.76	0.7789
Sample Size	n = 5		n=8			n=10		n=9			n=8		n=7

## Sheet: STable 5
Extended data Table S5: List of free fatty acids in skin of WT and Apoe-/- mice across age
FFA in skin (µmol/mg)	10weeks					17weeks					>30weeks
	WT		Apoe-/-		p-value	WT		Apoe-/-		p-value	WT		Apoe-/-		p-value
	mean	sem	mean	sem		mean	sem	mean	sem		mean	sem	mean	sem
FA 17:1	21.04	5.362	19.16	3.118	>0.9999	29.87	12.12	50.03	6.255	0.0057	18.42	0.9738	72.39	20.85	0.0003
FA 18:1	951.4	277.9	1254	223.3	0.5237	1788	817.1	3711	654.8	0.0133	1215	81.63	5898	1291	0.0003
FA 18:2	301.2	72.05	385.2	71.36	0.6216	266.5	119.2	612.8	106.8	0.0021	138.6	8.56	861.8	216.1	0.0003
FA 20:2	13.47	3.327	45.26	8.773	0.0109	18.15	6.832	93.07	23.59	0.001	10.14	1.29	169.7	17.46	0.0003
FA 20:4	1587	384.1	3246	590.2	0.0653	2170	1015	6101	1549	0.0041	917.2	140.5	11230	1799	0.0003
FA 20:5	23.38	3.244	141	23.04	0.0016	50.56	23.89	339.4	97.74	0.0006	14.38	1.593	472.1	84.76	0.0003
FA 22:1	8.824	2.239	14.09	2.651	0.2222	12.63	5.285	43.34	8.885	0.001	6.316	0.5323	78.2	7.519	0.0003
FA 22:4	135.9	29.78	795.8	158.7	0.0016	154.5	79.4	1179	334.4	0.001	58.73	7.4	2373	295.9	0.0003
FA 22:5	175.4	39.74	420	77	0.0186	246.5	132.8	887.9	232.2	0.0015	85.78	8.886	1626	173	0.0003
FA 22:6	719.4	182.4	942.2	186.9	0.6216	1221	666.6	2301	564.1	0.003	381.6	46.29	4534	731.9	0.0003
FA 24:1	15.35	3.97	28.75	5.05	0.0932	17.13	6.502	63.8	13.38	0.0006	10.99	1.456	186.9	20.31	0.0003
FA 24:6	7.969	2.336	24.94	5.26	0.0109	10.16	5.779	50.08	14.57	0.001	3.366	0.5402	114.8	18.72	0.0003
FA 14:0	24.04	6.195	28.63	5.39	0.8329	28.09	10.19	65.87	11.08	0.0057	17.06	0.9941	105.4	38.14	0.0003
FA 16:0	355.4	99.42	362.6	60.22	>0.9999	425.8	151.9	778.2	113.2	0.0133	268.1	17.24	1162	264.1	0.0003
FA 16:1	151.7	44.39	201	41.67	0.5237	226.4	83.23	565.3	94.88	0.0076	156.4	10.28	929.9	356.3	0.0003
Sample size	n = 5		n=8			n=10		n=9			n=8		n=7

## Sheet: STable 6
Extended data Table S6: List of triglycerides in plasma of WT and Apoe-/- mice across age
TG in plasma (pmol/µl)	10weeks					17weeks					>30weeks
	WT		Apoe-/-		p-value	WT		Apoe-/-		p-value	WT		Apoe-/-		p-value
	mean	sem	mean	sem		mean	sem	mean	sem		mean	sem	mean	sem
TG 48:1	12.7	2.041	38.17	9.616	0.0109	7.709	1.301	36.79	5.235	<0.0001	6.626	1.66	19.76	4.177	0.0022
TG 48:1 [-14:0]	4.118	0.7536	12.67	3.365	0.0186	2.407	0.4172	11.91	1.811	<0.0001	2.017	0.5414	6.355	1.408	0.0022
TG 48:1 [-16:0]	7.835	1.246	22.7	5.559	0.0062	4.973	0.7828	22.5	3.073	<0.0001	4.31	0.9915	11.98	2.458	0.0022
TG 48:1 [-16:1]	1.698	0.2052	5.092	0.98	0.0016	1.21	0.1899	5.474	0.6352	<0.0001	1.048	0.207	2.889	0.5506	0.0037
TG 48:1 [-18:1]	4.948	0.9407	15.93	4.568	0.0186	2.723	0.5063	14.52	2.32	<0.0001	2.297	0.6694	7.602	1.733	0.0037
TG 48:2	4.248	0.4664	10.42	2.237	0.0062	3.074	0.3835	11	1.416	<0.0001	2.722	0.4408	6.136	1.114	0.0059
TG 48:2 [-14:0]	0.9936	0.1261	2.437	0.571	0.0186	0.6561	0.0939	2.445	0.3387	<0.0001	0.5559	0.1048	1.266	0.2294	0.0059
TG 48:2 [-16:0]	1.395	0.1312	3.227	0.7012	0.0686	0.9451	0.121	3.357	0.4424	<0.0001	0.8251	0.132	1.761	0.2891	0.0088
TG 48:2 [-16:1]	1.418	0.1394	2.527	0.3546	0.0186	1.264	0.1382	3.229	0.3297	<0.0001	1.174	0.1715	1.749	0.2191	0.0939
TG 48:2 [-18:1]	1.231	0.2081	3.487	0.9358	0.0295	0.8548	0.1263	3.354	0.5222	<0.0001	0.7062	0.1426	1.728	0.3305	0.0059
TG 48:2 [-18:2]	0.622	0.08405	1.944	0.5298	0.0062	0.2929	0.05705	1.782	0.2626	<0.0001	0.2518	0.07115	0.8986	0.2248	0.0037
TG 50:1	35.97	3.601	108.5	22.75	0.0016	27.37	2.614	131.9	17.06	<0.0001	22.27	3.368	72.64	13.53	0.0022
TG 50:1 [-16:0]	37.18	2.917	101.5	19.66	0.0016	29.97	2.688	118.4	13.48	<0.0001	23.93	3.243	68.32	10.88	0.0022
TG 50:1 [-18:1]	17.9	1.982	54.44	11.56	0.0016	13.05	1.404	62.83	7.542	<0.0001	10.94	1.824	34.63	6.509	0.0022
TG 50:2	32.74	1.503	60.09	11.2	0.0932	29.46	2.683	79.71	9.013	<0.0001	22.61	2.788	43.38	7.313	0.0289
TG 50:2 [-16:0]	18.57	0.7872	29.09	4.355	0.1709	16.27	1.303	39.51	4.581	<0.0001	13.16	1.367	23.13	3.294	0.0401
TG 50:2 [-16:1]	9.876	0.4556	14.01	1.794	0.1274	9.678	0.9019	22.09	2.497	0.0006	7.64	0.9314	12.34	1.786	0.0939
TG 50:2 [-18:1]	15.82	1.232	27.38	5.217	0.1709	14.17	1.386	38.23	4.292	<0.0001	10.57	1.484	20.2	3.399	0.0289
TG 50:2 [-18:2]	3.673	0.271	9.046	1.787	0.0031	2.513	0.2496	9.724	1.101	<0.0001	2.093	0.2774	5.53	1.148	0.0037
TG 50:3	6.335	0.4099	11.6	1.805	0.0932	5.714	0.4853	15.84	1.85	<0.0001	4.519	0.5559	8.364	1.305	0.0289
TG 50:3 [-16:0]	1.429	0.05528	2.453	0.3678	0.1709	1.244	0.0862	3.336	0.3628	<0.0001	0.9029	0.09239	1.699	0.2339	0.0093
TG 50:3 [-16:1]	2.845	0.1984	3.524	0.4044	0.1274	2.913	0.2719	5.901	0.6981	0.001	2.547	0.3267	2.981	0.3702	0.5358
TG 50:3 [-18:1]	1.948	0.1673	3.245	0.583	0.1709	1.701	0.168	4.501	0.4815	<0.0001	1.413	0.205	2.199	0.3187	0.0541
TG 50:3 [-18:2]	1.531	0.05834	3.069	0.5154	0.0653	1.232	0.1101	3.905	0.4126	<0.0001	0.9157	0.1164	2.045	0.3517	0.014
TG 52:1	20.92	1.999	49.99	9.072	0.0016	15.09	1.43	66.4	9.172	<0.0001	12.71	1.697	40.15	7.988	0.0012
TG 52:1 [-16:0]	12.45	1.237	28.03	4.792	0.0016	9.164	0.838	35.49	4.186	<0.0001	7.712	0.8123	22.3	4.234	0.0012
TG 52:1 [-18:0]	11.53	11.53	28.58	28.58	0.0016	8.765	0.77	36.18	4.608	<0.0001	7.471	0.8396	22.4	4.25	0.0012
TG 52:2	89.04	4.823	144.9	22.1	0.1709	88.56	7.716	249.1	28.66	0.0004	60.94	6.967	143.6	23.76	0.0093
TG 52:2 [-16:0]	46.24	2.483	71.06	10.3	0.1709	46.02	3.685	120.8	14.14	0.0006	32.5	3.431	71.65	11.29	0.0093
TG 52:2 [-18:0]	2.906	0.1426	6.635	1.123	0.0016	2.695	0.2165	8.664	0.9658	<0.0001	1.987	0.2081	4.783	0.7622	0.0012
TG 52:2 [-18:1]	88.96	5.431	142	22.59	0.1709	86.55	7.691	252	31.31	0.0004	59.01	6.492	142.9	23.84	0.0059
TG 52:2 [-18:2]	1.604	0.1142	4.421	0.7853	0.0016	1.207	0.1118	5.517	0.6725	<0.0001	1.003	0.1081	3.132	0.6114	0.0006
TG 52:3	45.15	1.867	60.66	7.853	0.1709	44.43	3.185	97.81	11.24	0.0015	33.4	3.507	54.42	7.957	0.0721
TG 52:3 [-16:0]	13.3	0.8931	18.5	2.566	0.2222	11.64	0.5921	26.33	2.705	0.0004	8.618	0.5656	16.04	2.284	0.0401
TG 52:3 [-18:1]	29.96	1.279	36.17	4.888	0.2844	30.27	2.618	59.18	6.854	0.0021	23.52	2.758	32.49	4.606	0.1206
TG 52:3 [-18:2]	12.93	0.8467	19.45	2.639	0.1709	11.36	0.5297	27.14	2.823	0.0021	8.108	0.5933	16.67	2.363	0.014
TG 52:4 [-16:1]	1.384	0.05388	1.684	0.2087	0.1709	1.319	0.08889	2.754	0.3017	0.0021	1.034	0.09914	1.461	0.1805	0.1206
TG 52:4 [-18:1]	1.908	0.08873	2.677	0.3351	0.1709	1.852	0.1356	4.203	0.4736	0.001	1.377	0.1304	2.132	0.3098	0.0939
TG 52:4 [-18:2]	3.757	0.1552	4.821	0.4937	0.2222	3.52	0.1543	6.191	0.5379	0.0021	2.874	0.1339	4.122	0.431	0.0721
TG 52:5 [-18:2]	0.4019	0.02517	0.5407	0.04424	0.0653	0.4224	0.01909	0.627	0.04595	0.003	0.3291	0.01446	0.4675	0.03973	0.014
TG 52:5 [-18:3]	0.1778	0.007024	0.2648	0.03156	0.1709	0.1599	0.009192	0.3819	0.0426	<0.0001	0.1188	0.009781	0.2107	0.02608	0.0401
TG 54:2	14.68	0.8499	29.63	4.229	0.0186	14.76	0.993	45.37	5.354	<0.0001	11.19	0.9795	27.03	3.848	0.0012
TG 54:2 [-18:0]	7.61	0.2966	14.37	2.202	0.0295	7.19	0.4534	20.79	2.373	<0.0001	5.829	0.4346	12.53	1.824	0.0012
TG 54:2 [-18:1]	14.68	0.741	28.41	4.318	0.0295	13.72	0.9117	41.42	4.827	<0.0001	11.09	0.867	24.81	3.655	0.0006
TG 54:3	40.95	1.981	53.8	7.06	0.2222	46.6	4.132	94.54	11.25	0.0021	36.53	4.006	54.14	7.223	0.0721
TG 54:3 [-18:0]	3.372	0.1328	4.784	0.6223	0.2222	3.35	0.2295	6.327	0.5746	0.0002	2.525	0.08804	3.985	0.4654	0.0037
TG 54:3 [-18:1]	56.98	3.635	74.54	10.09	0.2222	65.07	6.238	131.6	16.77	0.003	51.57	5.654	72.86	9.417	0.1206
TG 54:3 [-18:2]	3.055	0.144	4.86	0.5948	0.0451	3.138	0.1899	6.493	0.5937	<0.0001	2.472	0.08305	4.116	0.5332	0.0059
TG 54:4 [-18:1]	15.09	0.5493	19.58	2.095	0.2222	15.54	0.8959	27.24	2.42	0.0015	11.88	0.7875	18.23	1.936	0.0721
TG 54:4 [-18:2]	7.916	0.3731	10.87	1.035	0.1709	8.547	0.4813	14.51	1.274	0.0015	6.906	0.4257	9.814	0.9798	0.0401
TG 54:5	6.17	0.2961	7.933	0.5863	0.0932	6.634	0.3568	10.2	0.7768	0.003	5.457	0.1002	7.211	0.5904	0.0541
TG 54:5 [-18:3]	0.4812	0.01693	0.6823	0.07484	0.3543	0.4935	0.02401	1.044	0.1095	0.0015	0.3684	0.01785	0.6252	0.08326	0.0541
TG 54:6 [-18:3]	0.1977	0.01565	0.2419	0.02717	0.1709	0.2262	0.01489	0.3045	0.01523	0.0015	0.1873	0.005219	0.228	0.0165	0.0939
TG 54:6 [-20:4]	0.1868	0.02298	0.9575	0.1662	0.0016	0.1371	0.02209	1.207	0.1647	<0.0001	0.1145	0.01321	0.7234	0.1946	0.0003
TG 54:6 [-20:5]	0.07898	0.007616	0.5626	0.1174	0.0016	0.0787	0.009097	1.14	0.2642	<0.0001	0.03841	0.005391	0.4386	0.1338	0.0003
TG 56:5 [-20:4]	0.2966	0.03432	1.218	0.2302	0.0031	0.293	0.04903	1.658	0.2111	<0.0001	0.1782	0.0203	1.038	0.2822	0.0006
TG 56:6	0.843	0.07602	3.167	0.5177	0.0031	0.6751	0.09939	4.358	0.6144	<0.0001	0.6145	0.05814	3.022	0.7371	0.0003
TG 56:6 [-20:4]	0.4158	0.04624	1.882	0.331	0.0031	0.3592	0.04748	2.464	0.3295	<0.0001	0.3115	0.03352	1.572	0.4093	0.0006
TG 58:9 [-22:6]	0.1401	0.02651	0.1897	0.04045	0.4351	0.1358	0.02322	0.3787	0.05996	0.003	0.06896	0.007339	0.1663	0.04185	0.1206
Sample Size	n = 5		n=8			n=10		n=9			n=8		n=7

## Sheet: STable 7
Extended data Table S7: List of free fatty acids in plasma of WT and Apoe-/- mice across age
FFA in plasma (µM)	10weeks					17weeks					>30weeks
	WT		Apoe-/-		p-value	WT		Apoe-/-		p-value	WT		Apoe-/-		p-value
	mean	sem	mean	sem		mean	sem	mean	sem		mean	sem	mean	sem
FA 18:1	179.5	15.93	148	10.48	0.2844	180.5	9.351	123.7	9.547	0.0015	137	11.24	111.4	3.37	0.1206
FA 18:2	26.92	1.871	26.27	2.461	0.7242	20.3	1.068	20.9	1.544	0.9048	15.12	0.9999	15.37	0.7475	0.9551
FA 20:4	60.76	3.221	72.57	6.077	0.3543	43.94	3.346	50.85	3.538	0.3154	48.48	3.771	38.72	5.46	0.1206
FA 20:5	9.442	3.642	9.682	1.854	0.6216	8.488	1.359	10.85	1.618	0.2775	4.837	0.8929	4.908	0.75	0.8665
FA 22:4	3.009	0.2314	3.24	0.1422	0.9433	2.04	0.1447	2.081	0.1038	0.8421	2.027	0.1702	2.033	0.1144	>0.9999
FA 22:5	7.665	0.5926	8.018	0.4506	0.7242	6.388	0.3463	4.876	0.3341	0.0101	5.754	0.4284	4.963	0.3329	0.2319
FA 22:6	61.36	6.313	48.93	5.004	0.2222	56.44	2.988	45.07	3.449	0.0172	44.28	3.086	32	4.357	0.0289
FA 14:0	3.414	0.1184	3.65	0.2641	0.4351	2.869	0.171	2.93	0.2141	0.8421	2.563	0.1683	2.522	0.3516	0.9551
FA 16:0	90.26	5.877	95.14	7.624	0.8329	87.86	6.316	83.57	9.497	0.8421	75.88	4.022	67.9	10.22	0.3357
FA 16:1	16.92	1.653	17.76	1.364	0.6216	19.77	0.9584	17.33	1.209	0.1333	16.85	1.569	12.28	1.09	0.0939
Sample size	n = 5		n=8			n=10		n=9			n=8		n=7
